# Supplementary material
Source: MDPI journal article supplement (https://www.mdpi.com/2073-4344/7/5/140)
Supplement: s1 [file s1]

# Supplementary Materials: Title Exploring Promising Catalysts for Chemical Hydrogen Storage in Ammonia Borane: A Density Functional Theory Study

Sateesh Bandaru, Niall J. English, Andrew D. Phillips and J. M. Don MacElroy

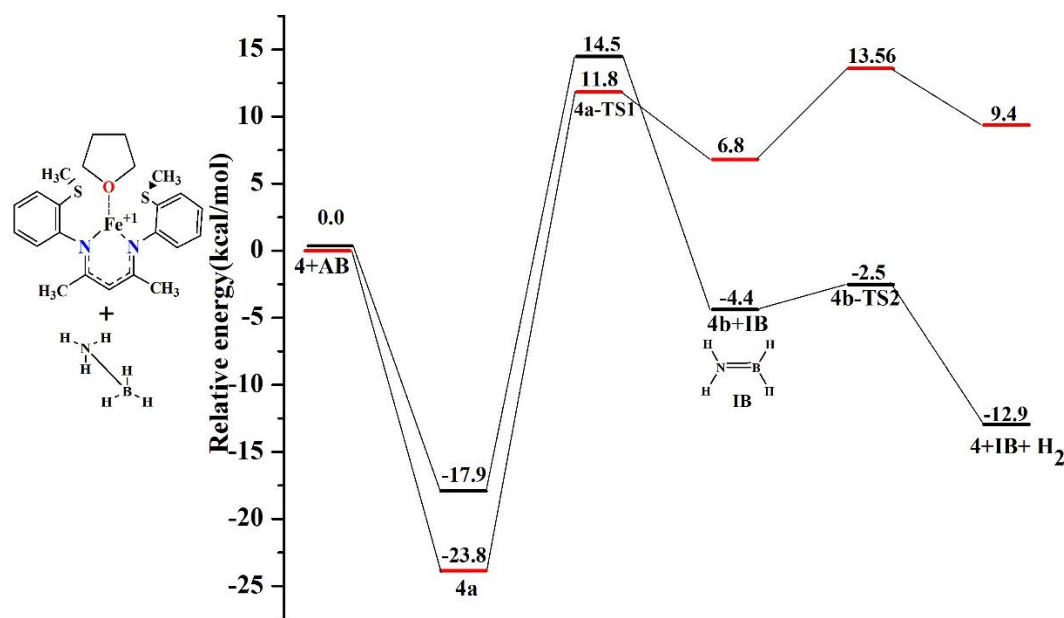

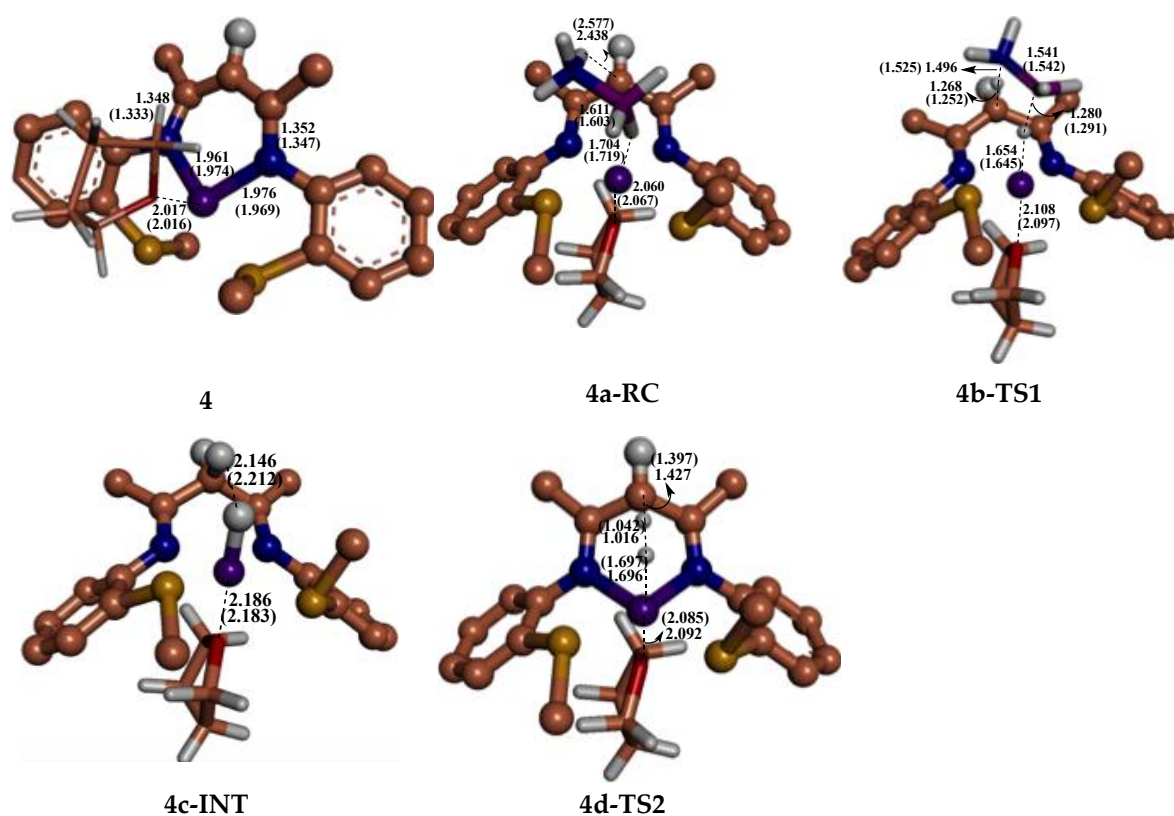

**Figure S2.** Significant optimised geometries of important stationary points for the reaction coordinate of AB addition to Fe metal catalyst **4**. Important hydrogen atoms are shown for clarity.
